# Supplementary material for: Analysis of intact prophages in genomes of Paenibacillus larvae: An important pathogen for bees
Source: Front Microbiol. 2022 Jul 15;13:903861. doi: 10.3389/fmicb.2022.903861 (PMC9341999; doi:10.3389/fmicb.2022.903861)
Supplement: Supplementary file 4 [file Table_4.XLSX]

## Sheet: Validated prophages (n=55)
Table S4: List of prophages (n = 55), sizes, locations, GC% content, number of proteins and respective percentage of prophages occupation in the host genome.
	Prophage	Size prophage (kb)	Genome location	GC %	No. of Proteins	No. Phage hit Proteins	No. Hypothetical Proteins	No. Bacterial Proteins	Genes per 1000 bp	Prophage occupation (%)
	H3_R2	34.5	681173-715670	44.38	48	45	1	1	1.3913	9.71048
	H3_R3	108.1	831955-940117	44.9	159	140	18	1	1.47086
	H3_R5	23.6	1143970-1167596	42.02	42	41	1	0	1.77966
	H3_R6	66.1	1356508-1422655	47.76	86	78	8	0	1.30106
	H3_R11	62.1	3162110-3224300	42.61	69	62	7	0	1.11111
	H3_R14	45.5	3306542-3352032	43.1	79	73	5	1	1.73626
	H3_R15	54.4	3581259-3635668	41.35	75	62	12	1	1.37868
	H3_R18	50.4	4317267-4367698	42.68	50	48	2	0	0.992063
	H5_R2	71.8	939245-1011069	41.94	84	73	11	0	1.16992	4.02379
	H5_R6	40.7	3037678-3078354	43.11	51	45	6	0	1.25307
	H5_R13	55.9	3924820-3980782	42.57	79	52	27	0	1.41324
	H6_R1	50.4	384329-434773	42.68	50	48	1	1	0.992063	5.99774
	H6_R3	45.6	567210-612826	40.28	71	71	0	0	1.55702
	H6_R6	65.4	1390736-1456212	47.09	77	72	5	0	1.17737
	H6_R7	50.4	1687454-1737901	44.06	65	57	8	0	1.28968
	H6_R8	45.5	1956974-2002463	43.1	75	69	5	1	1.64835
	H7_R1	57.3	88-57405	48.33	86	73	12	1	1.50087	3.61357
	H7_R6	40.4	1473939-1514356	40.09	57	54	1	2	1.41089
	H7_R10	61.7	3174514-3236266	41.59	58	53	4	1	0.940032
	H8_R2	53.7	406153-459928	40.54	65	56	9	0	1.21043	5.8155
	H8_R6	55.7	913539-969255	42.48	64	55	5	4	1.14901
	H8_R7	44.1	984737-1028855	43.57	63	60	2	1	1.42857
	H8_R8	40.4	1152782-1193204	43.09	56	53	1	2	1.38614
	H8_R12	58.1	3606955-3665135	48.26	82	69	13	0	1.41136
	H9_R3	48.9	139657-188607	41.67	76	69	7	0	1.55419	7.75321
	H9_R4	69.1	561067-630176	41.16	86	76	10	0	1.24457
	H9_R5	60.2	783750-843985	43.02	81	71	9	1	1.34551
	H9_R8	34.3	1244130-1278477	47.43	50	40	10	0	1.45773
	H9_R10	37.9	2926094-2964064	46.51	54	44	10	0	1.4248
	H9_R14	52.2	3581986-3634265	40.98	75	65	10	0	1.43678
	H9_R15	59.2	3759316-3818534	41.01	84	75	9	0	1.41892
	H10_R4	45.6	1225459-1271112	43.61	73	73	0	0	1.60088	5.58179
	H10_R5	54.4	1500351-1554760	41.35	69	59	9	1	1.26838
	H10_R7	55.6	1783038-1838681	48.24	77	72	5	0	1.38489
	H10_R10	45.6	2612626-2658322	40.28	70	70	0	0	1.53509
	H10_R12	38.2	2801425-2839627	43.44	49	48	1	0	1.28272
	H11_R3	48.5	781533-830040	41.26	55	51	4	0	1.13402	7.80554
	H11_R8	58.1	1983129-2041310	48.26	83	70	12	1	1.42857
	H11_R10	52.2	2793355-2845586	40.55	65	56	8	1	1.24521
	H11_R12	55.5	3251793-3307294	40.55	67	58	8	1	1.20721
	H11_R13	51.6	3343780-3395451	43.39	68	58	5	5	1.31783
	H11_R14	44.1	3410981-3455101	43.56	63	60	2	1	1.42857
	H11_R15	40.4	3579035-3619457	43.08	57	54	1	2	1.41089
	H12_R3	52.1	775998-828193	41.25	55	51	3	1	1.05566	3.52809
	H12_R8	58.1	1999595-2057776	48.26	83	70	12	1	1.42857
	H12_R13	40.4	3358511-3398933	43.09	57	54	1	2	1.41089
	H13_R11	71	2606614-2677682	48.07	98	79	18	1	1.38028	1.7647
	H14_R2	36.7	676583-713337	46.89	52	40	12	0	1.41689	8.53088
	H14_R3	44.8	750873-795687	43.11	65	57	8	0	1.45089
	H14_R7	51.9	1374400-1426330	41.32	72	68	4	0	1.38728
	H14_R8	42.3	1543921-1586235	41.92	74	66	8	0	1.74941
	H14_R9	64.3	1785306-1849567	47.6	88	73	14	1	1.36858
	H14_R10	41.7	1909535-1951277	42.63	69	58	11	0	1.65468
	H14_R14	57.5	2988754-3046269	48.29	88	74	14	0	1.53043
	H14_R15	59.4	3044287-3103635	41.42	84	68	14	2	1.41414
	Average	51.8836	Average	43.5415					Average	5.83
	Standard deviation	12.6633	Standard deviation	2.61646					Standard deviation	2.45
